# Supplementary material
Source: PubMed Central journal article supplement (PMC9944844)
Supplement: NIHMS1865225-supplement-Supplement.pdf [file NIHMS1865225-supplement-Supplement.pdf]

**SUPPLEMENTAL MATERIAL**

**Supplemental Figure 1. Enrollment Numbers in FH<sup>9+</sup> Study Arm**

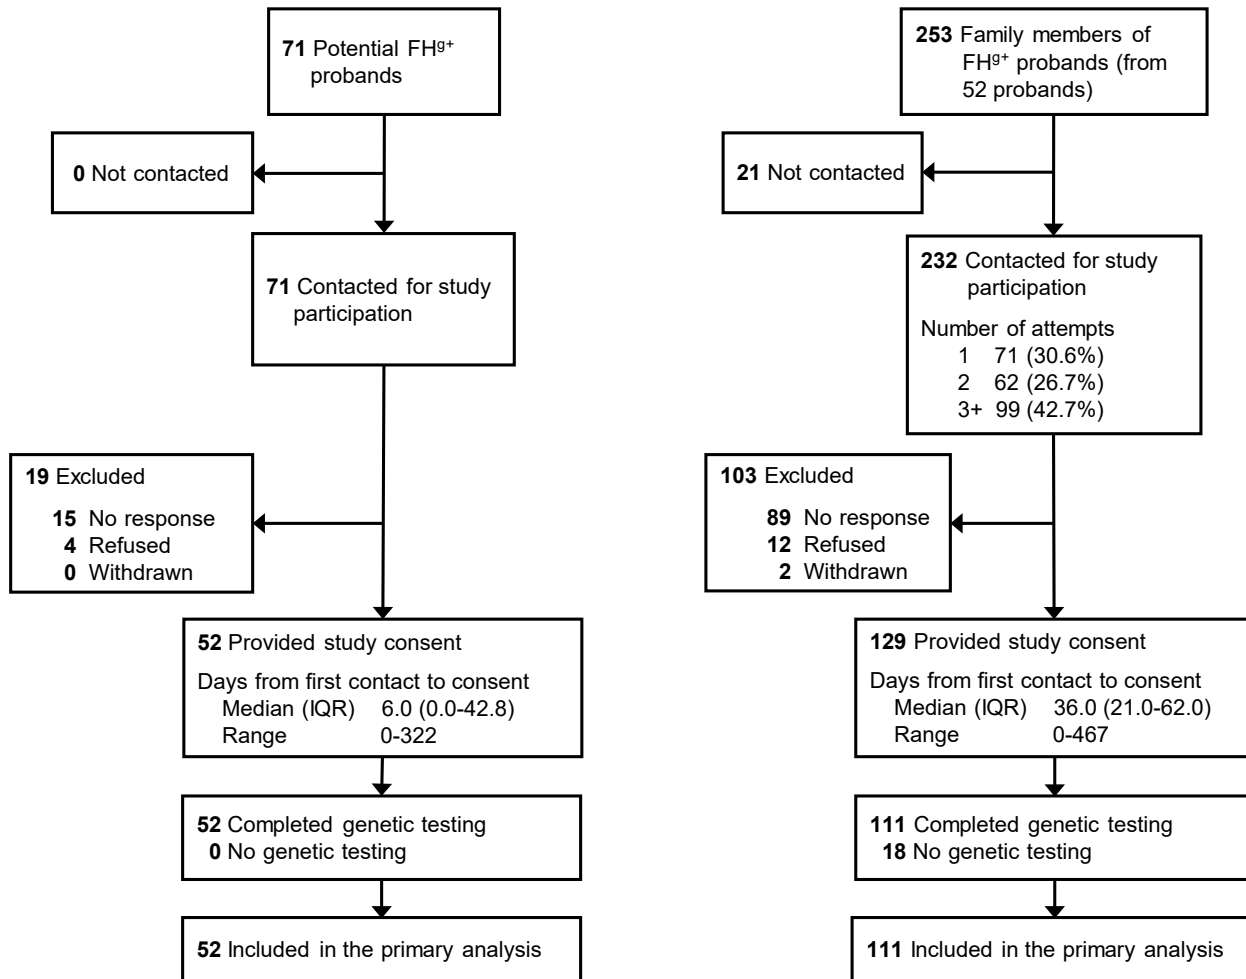

Abbreviation: FH<sup>9+</sup>, familial hypercholesterolemia with a pathogenic variant.

**Supplemental Figure 2. Enrollment Numbers in FH<sup>g-</sup> Study Arm**

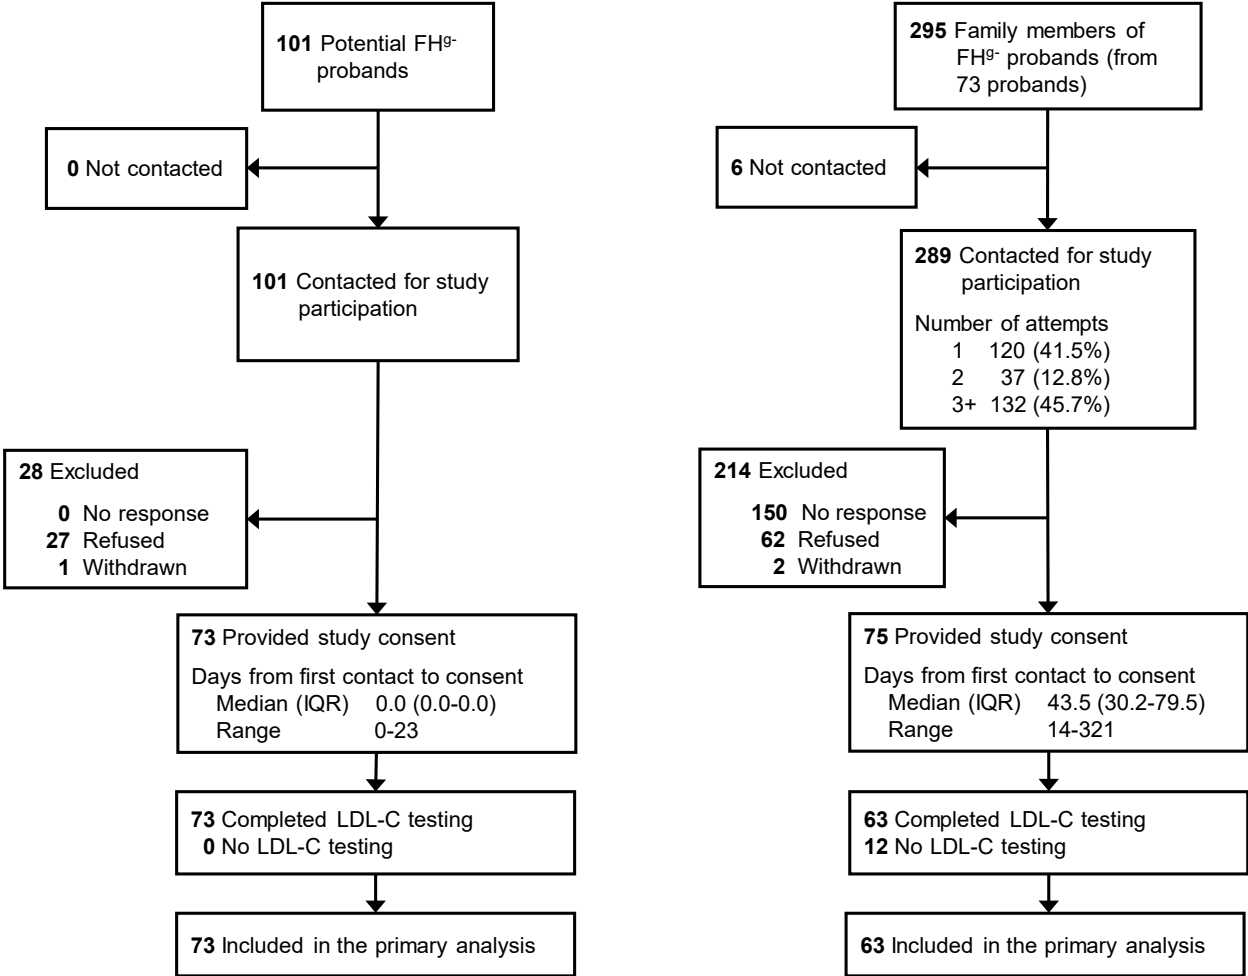

Abbreviations: FH<sup>g-</sup>, familial hypercholesterolemia without a pathogenic variant; LDL-C, low-density lipoprotein cholesterol.

Supplemental Figure 3. Participant Recruitment Flow Diagram

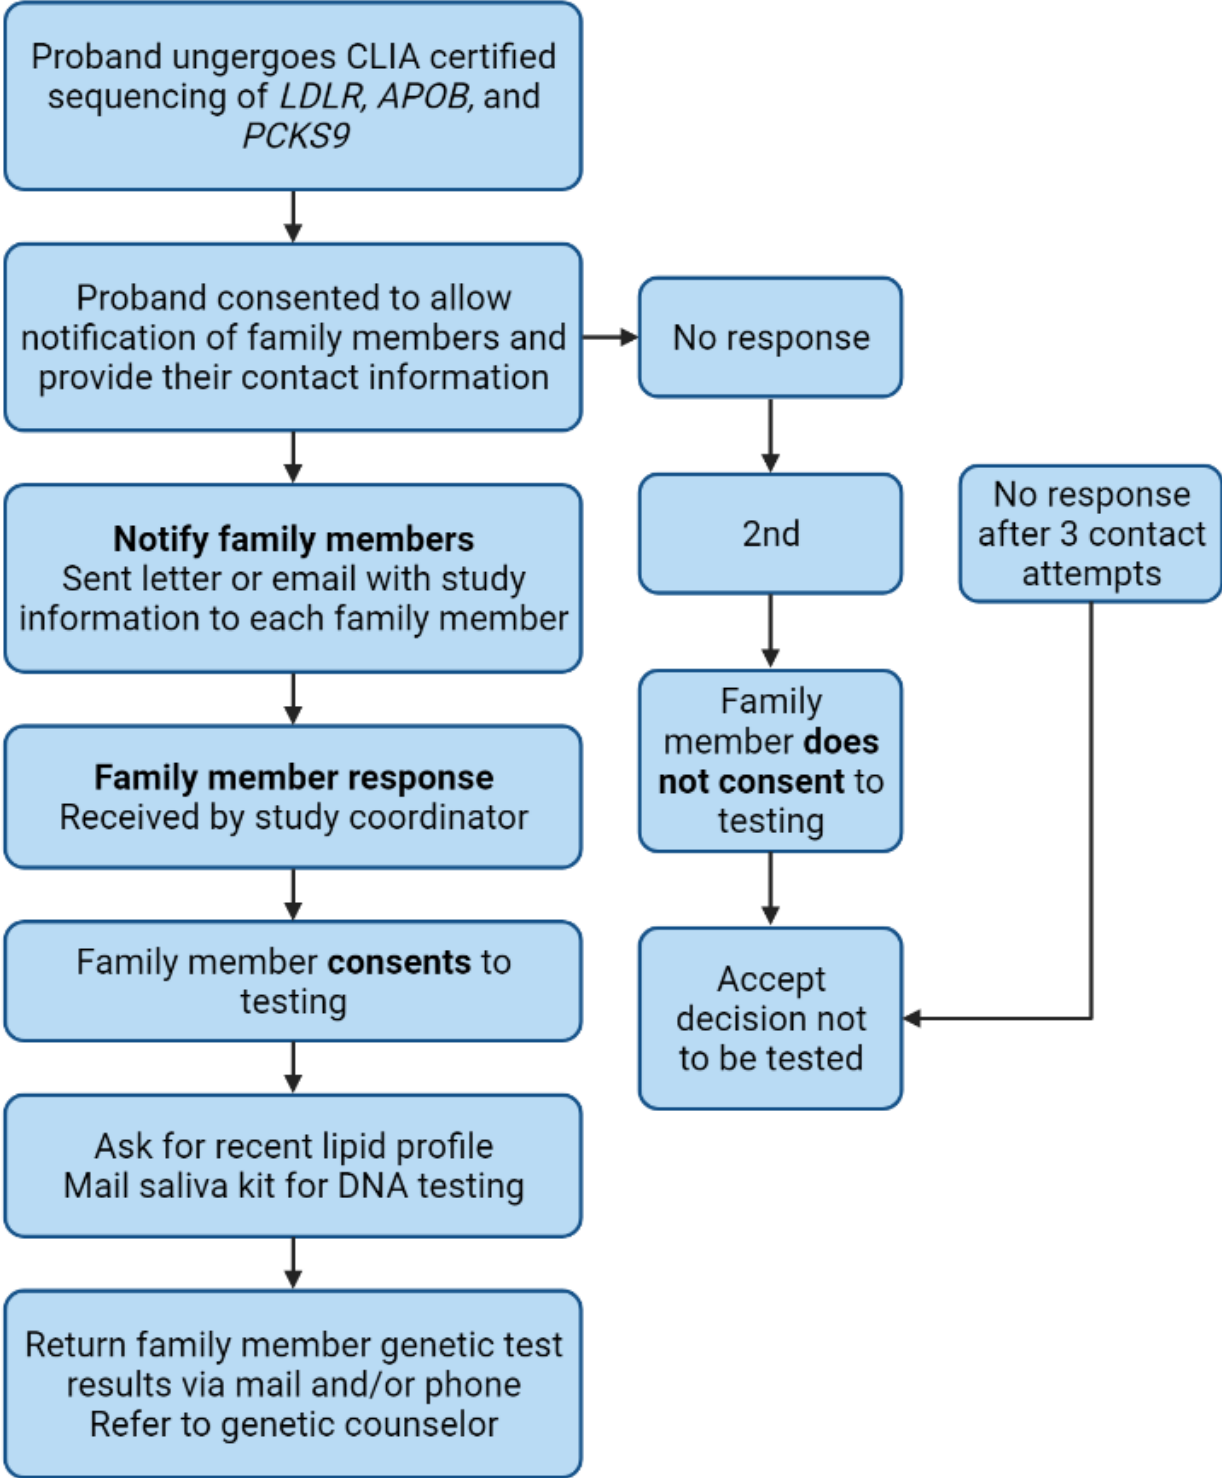

### **Cascade Testing Beyond First-Degree Relatives**

FH<sup>g+</sup> and FH<sup>g-</sup> probands were asked to provide the study team a list of relatives at the time of consent.

**Of 52 FH<sup>g+</sup> probands**, 10 provided family member contact information for 48 second- and third-degree relatives (**eFig 4**).

Additionally, when a new case in an FH<sup>g+</sup> family member (defined as presence of a P/LP variant) was detected, they were mailed a copy of their results along with 2 copies of the consent form that provided the study team permission to contact relatives. Of the 37 new cases detected in first-degree relatives, 7 consented for the study team to contact the family members they listed (**eFig 4**). The relatives they provided were listed in the context of their relation to the original proband.

The study team required variant confirmation in a first-degree relative prior to contacting second-degree relatives and so on. In all, 35 second and third-degree relatives were contacted by the study team with 19 consenting to the study, 16 completing genetic testing, and 11 new cases (defined as presence as a P/LP variant) were detected.

**Of 73 FH<sup>g-</sup> probands**, none provided contact information for second- or third-degree relatives.

**Supplemental Figure 4. Cascade Testing Beyond First-Degree Relatives**

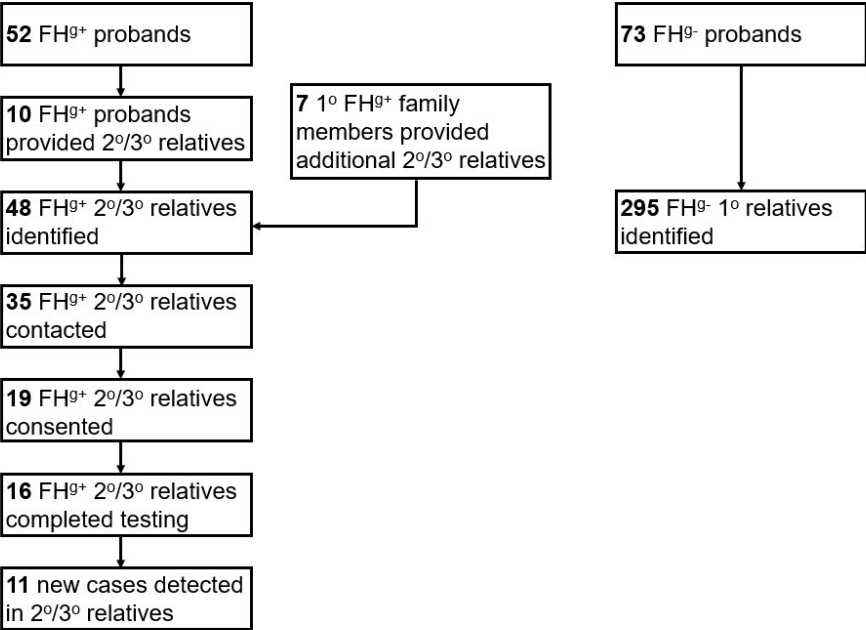

### Supplemental Table 1. FH<sup>9+</sup> Proband Variant List

| Gene  | P/LP Variant (n=52)             |
|-------|---------------------------------|
| LDLR  | c.1187-2A>G (n=1)               |
| LDLR  | c.1238C>T (n=1)                 |
| LDLR  | c.1246C>T (n=1)                 |
| LDLR  | c.131G>A (n=1)                  |
| LDLR  | c.1329G>C (n=2)                 |
| LDLR  | c.1358+2T>A, splice donor (n=1) |
| LDLR  | c.1359-1G>A (n=1)               |
| LDLR  | c.1444G>A (n=2)                 |
| LDLR  | c.1474G>A (n=1)                 |
| LDLR  | c.1576C>T (n=1)                 |
| LDLR  | c.1586+5G>A, intronic (n=1)     |
| LDLR  | c.1640T>C (n=1)                 |
| LDLR  | c.1860G>A (n=1)                 |
| LDLR  | c.2054C>T (n=1)                 |
| LDLR  | c.254_265delTCTGGAGGT (n=1)     |
| LDLR  | c.259T>G (n=4)                  |
| LDLR  | c.313+1G>A, splice donor (n=2)  |
| LDLR  | c.324_325delisnTC (n=1)         |
| LDLR  | c.501C>A (n=1)                  |
| LDLR  | c.502G>C (n=1)                  |
| LDLR  | c.551G>A (n=1)                  |
| LDLR  | c.644G>A (n=1)                  |
| LDLR  | c.662A>G (n=1)                  |
| LDLR  | c.782G>T (n=1)                  |
| LDLR  | c.796G>A (n=2)                  |
| LDLR  | c.798T>A (n=2)                  |
| LDLR  | c.862G>A (n=1)                  |
| LDLR  | Del Exons 2-3 (n=1)             |
| LDLR  | Del Exons 16-18 (n=1)           |
| LDLR  | Del Exon 18 (n=1)               |
| PCSK9 | c.94G>A (n=1)                   |
| APOB  | c.10580G>A (n=13)               |

## Supplemental Table 2. Lipid Lowering Treatment for Proband's Who Provided Consent and Completed Testing

| Characteristic                          | Proband Type                 |                              | P value <sup>a</sup> |
|-----------------------------------------|------------------------------|------------------------------|----------------------|
|                                         | FH <sup>g+</sup><br>(n = 52) | FH <sup>g-</sup><br>(n = 73) |                      |
| Ever used a statin                      | 50 (96.2%)                   | 68 (93.2%)                   | .472                 |
| At time of highest LDL-C measurement    |                              |                              |                      |
| Lipid lowering treatment                | 14                           | 4                            | <.001                |
| Only statin use                         | 12                           | 4                            | .004                 |
| Type of statin <sup>b</sup>             |                              |                              | --                   |
| Atorvastatin                            | 6                            | 1                            |                      |
| Lovastatin                              | 2                            | 1                            |                      |
| Rosuvastatin                            | 1                            | 1                            |                      |
| Simvastatin                             | 3                            | 1                            |                      |
| Only non-statin use                     | 1                            | 0                            | .234                 |
| Type of non-statin <sup>b</sup>         |                              |                              | --                   |
| Evolocumab                              | 1                            | 0                            |                      |
| Combined statin and non-statin use      | 1                            | 0                            | .234                 |
| Type of medications <sup>b</sup>        |                              |                              | --                   |
| Rosuvastatin and ezetimibe              | 1                            | 0                            |                      |
| Current use at follow-up                |                              |                              |                      |
| Lipid lowering treatment                | 47 (90.4%)                   | 62 (84.9%)                   | .368                 |
| Only statin use                         | 27                           | 59                           | <.001                |
| Type of statin <sup>b</sup>             |                              |                              | --                   |
| Atorvastatin                            | 15                           | 36                           |                      |
| Pravastatin                             | 0                            | 3                            |                      |
| Rosuvastatin                            | 9                            | 8                            |                      |
| Rosuvastatin and simvastatin            | 1                            | 0                            |                      |
| Simvastatin                             | 2                            | 12                           |                      |
| Only non-statin use                     | 2                            | 3                            | .941                 |
| Type of non-statin <sup>b</sup>         |                              |                              | --                   |
| Ezetimibe                               | 2                            | 3                            |                      |
| Combined statin and non-statin use      | 18 (34.6%)                   | 0 (0.0%)                     | <.001                |
| Type of medications <sup>b</sup>        |                              |                              | --                   |
| Atorvastatin and evolocumab             | 1                            | 0                            |                      |
| Atorvastatin and ezetimibe              | 6                            | 0                            |                      |
| Atorvastatin, evolocumab, and ezetimibe | 2                            | 0                            |                      |
| Rosuvastatin and evolocumab             | 1                            | 0                            |                      |
| Rosuvastatin and ezetimibe              | 6                            | 0                            |                      |
| Rosuvastatin, evolocumab, and ezetimibe | 2                            | 0                            |                      |

Values are n (%).<sup>a</sup> Chi-square test, or reported as -- if not tested; <sup>b</sup> Percentages were calculated among people with the corresponding type of treatment.

Abbreviations: FH<sup>g+</sup>, familial hypercholesterolemia with a pathogenic variant; FH<sup>g-</sup>, familial hypercholesterolemia without a pathogenic variant; LDL-C, low-density lipoprotein cholesterol.

**Supplemental Table 3. Geographic Location of Family Members Who Provided Consent and Completed Testing**

| Characteristic            | Proband Type                  |                              |
|---------------------------|-------------------------------|------------------------------|
|                           | FH <sup>g+</sup><br>(n = 111) | FH <sup>g-</sup><br>(n = 63) |
| Region <sup>a</sup>       |                               |                              |
| <b>West north central</b> | <b>72 (64.9%)</b>             | <b>50 (79.4%)</b>            |
| <b>Other</b>              | <b>39 (35.1%)</b>             | <b>13 (20.6%)</b>            |
| Mid-Atlantic              | 4 (3.6%)                      | 2 (3.2%)                     |
| East north central        | 10 (9.0%)                     | 4 (6.3%)                     |
| New England               | 2 (1.8%)                      | 2 (3.2%)                     |
| South Atlantic            | 6 (5.4%)                      | 1 (1.6%)                     |
| East south central        | 1 (0.9%)                      | 0 (0.0%)                     |
| West south central        | 4 (3.6%)                      | 0 (0.0%)                     |
| Mountain                  | 6 (5.4%)                      | 3 (4.8%)                     |
| Pacific                   | 6 (5.4%)                      | 1 (1.6%)                     |
| State                     |                               |                              |
| <b>Minnesota</b>          | <b>60 (54.1%)</b>             | <b>47 (74.6%)</b>            |
| <b>Other</b>              | <b>51 (45.9%)</b>             | <b>16 (25.4%)</b>            |
| Arizona                   | 3 (2.7%)                      | 2 (3.2%)                     |
| California                | 5 (4.5%)                      | 1 (1.6%)                     |
| Colorado                  | 2 (1.8%)                      | 0 (0.0%)                     |
| Connecticut               | 1 (0.9%)                      | 1 (1.6%)                     |
| Florida                   | 5 (4.5%)                      | 0 (0.0%)                     |
| Georgia                   | 1 (0.9%)                      | 0 (0.0%)                     |
| Iowa                      | 5 (4.5%)                      | 2 (3.2%)                     |
| Illinois                  | 0 (0.0%)                      | 1 (1.6%)                     |
| Indiana                   | 2 (1.8%)                      | 0 (0.0%)                     |
| Maryland                  | 0 (0.0%)                      | 1 (1.6%)                     |
| Michigan                  | 2 (1.8%)                      | 1 (1.6%)                     |
| Missouri                  | 2 (1.8%)                      | 0 (0.0%)                     |
| Mississippi               | 1 (0.9%)                      | 0 (0.0%)                     |
| Montana                   | 0 (0.0%)                      | 1 (1.6%)                     |
| North Dakota              | 5 (4.5%)                      | 0 (0.0%)                     |
| Nebraska                  | 0 (0.0%)                      | 1 (1.6%)                     |
| New Hampshire             | 1 (0.9%)                      | 1 (1.6%)                     |
| New York                  | 3 (2.7%)                      | 1 (1.6%)                     |
| Oklahoma                  | 1 (0.9%)                      | 0 (0.0%)                     |
| Pennsylvania              | 1 (0.9%)                      | 1 (1.6%)                     |
| Texas                     | 3 (2.7%)                      | 0 (0.0%)                     |
| Utah                      | 1 (0.9%)                      | 0 (0.0%)                     |
| Washington                | 1 (0.9%)                      | 0 (0.0%)                     |
| Wisconsin                 | 6 (5.4%)                      | 2 (3.2%)                     |

Values are n (%).<sup>a</sup> Regions of the United States as defined by the U.S. Census Bureau.

Abbreviations: FH<sup>g+</sup>, familial hypercholesterolemia with a pathogenic variant; FH<sup>g-</sup>, familial hypercholesterolemia without a pathogenic variant.



### Supplemental Table 4. Participation Rate, Uptake, and Yield of New Cases<sup>a</sup> by Proband Type Among First-Degree Family Members

| Parameter with 95% CIs <sup>b</sup>       | Proband Type        |                     | P value |
|-------------------------------------------|---------------------|---------------------|---------|
|                                           | FH <sup>g+</sup>    | FH <sup>g-</sup>    |         |
| Number of probands                        | 52                  | 73                  | --      |
| Number of family members                  |                     |                     |         |
| All identified                            | 202                 | 295                 | --      |
| With consent                              | 110                 | 75                  | --      |
| With consent and completed testing        | 95                  | 63                  | --      |
| Who met criteria as a new case            | 37                  | 17                  |         |
| Mean number of family members per proband |                     |                     |         |
| All identified                            | 3.9 (3.3-4.5)       | 4.0 (3.4-4.7)       | .692    |
| With consent                              | 2.1 (1.6-2.6)       | 1.0 (0.7-1.3)       | <.001   |
| With consent and completed testing        | 1.8 (1.4-2.3)       | 0.9 (0.6-1.1)       | <.001   |
| Who met criteria as a new case            | 0.7 (0.5-1.0)       | 0.2 (0.1-0.3)       | <.001   |
| NCIC <sup>c</sup>                         | 0.712 (0.481-0.962) | 0.233 (0.123-0.343) | <.001   |
| Uptake of cascade testing <sup>d</sup>    | 47.0% (36.8-55.9)   | 21.4% (15.8-26.7)   | <.001   |
| Yield of cascade testing <sup>e</sup>     | 38.9% (30.8-48.1)   | 27.0% (16.7-38.5)   | .092    |

Abbreviations: CIs, confidence intervals; DLCN, Dutch Lipid Network Clinic; FH<sup>g+</sup>, familial hypercholesterolemia with a pathogenic variant; FH<sup>g-</sup>, familial hypercholesterolemia without a pathogenic variant; LDL-C, low-density lipoprotein cholesterol; NCIC, new case per index case.

<sup>a</sup> New cases are defined as family members with consent who completed testing who had pathogenic variants among relatives of FH<sup>g+</sup> probands, and who had LDL-C  $\geq$ 155 mg/dL among relatives of FH<sup>g-</sup> probands.

<sup>b</sup> Confidence intervals were calculated using bootstrapping over 1,000 iterations. Each bootstrap sample selected 52 FH<sup>g+</sup> or 73 FH<sup>g-</sup> probands (simple random sampling with replacement) and their corresponding family members. Each parameter was calculated separately within each bootstrap sample and the 2.5<sup>th</sup> and 97.5<sup>th</sup> percentiles across all bootstrap samples defined the 95% confidence intervals.

<sup>c</sup> NCIC was calculated as the number of family members who met criteria as a new case divided by the total number of probands.

<sup>d</sup> Uptake was defined as the proportion of family members who consented and completed testing among all identified family members.

<sup>e</sup> Yield was defined as the proportion of family members who met criteria as a new case among family members who consented and completed testing.
